## Mechanics, hydrodynamics and energetics of blue whale lunge feeding: efficiency dependence on krill density

J. A. Goldbogen, J. Calambokidis, E. Oleson, J. Potvin, N. D. Pyenson, G. Schorr and R. E. Shadwick

10.1242/jeb.054726

There were several errors published in *J. Exp. Biol.* **214**, 131-146.

In the first line of the ‘Kinematics of diving and lunge feeding’ section of the Results (p. 134), the number of blue whales that were tagged was incorrectly given as 265 – the correct number is 25.

In Fig. A1 (p. 142), two mistakes were introduced. In the ‘Energy in’ column, krill energy density should have been given as  $4600 \text{ kJ kg}^{-1}$  (rather than  $4600 \text{ kJ g}^{-1}$ ). Also in the ‘Energy in’ column, the units were missing from the ‘Energy obtained from ingested krill’; this should have read ‘Energy obtained from ingested krill = 4,868,640 kJ’.

The correct version of the figure is shown below.

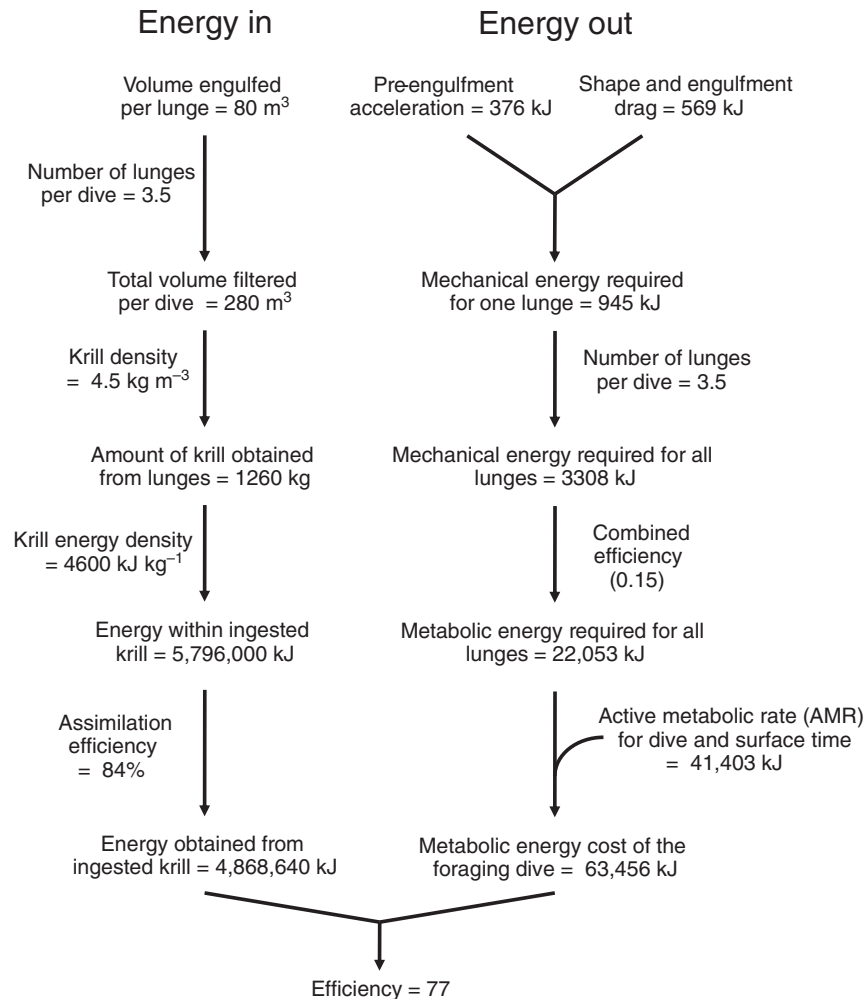

In Table 3, the data from the 'Net energy gain' column were inadvertently repeated in the 'Energy loss, total' column. The correct version of Table 3, with the original data for the 'Energy loss, total' column, is shown below.

Table 3. Effects of prey density on the efficiency of blue whale foraging dives

| Krill density (kg m <sup>-3</sup> ) | Body length (m) | Body mass (kg) | Volume filtered, total (m <sup>3</sup> ) | Krill obtained (kg) | Gross energy gain (kJ) | Energy loss, lunge (kJ) | Energy loss, diving (kJ) | Energy loss, total (kJ) | Net energy gain (kJ) | Efficiency, dive |
|-------------------------------------|-----------------|----------------|------------------------------------------|---------------------|------------------------|-------------------------|--------------------------|-------------------------|----------------------|------------------|
| 0.15                                | 22              | 61,318         | 210                                      | 32                  | 123,648                | 11,292                  | 29,475                   | 40,767                  | 82,881               | 3.0              |
|                                     | 25              | 96,568         | 280                                      | 43                  | 166,152                | 22,053                  | 41,403                   | 63,455                  | 102,696              | 2.6              |
|                                     | 27              | 122,605        | 385                                      | 58                  | 224,112                | 28,250                  | 49,499                   | 77,749                  | 146,363              | 2.9              |
| 0.50                                | 22              | 61,318         | 210                                      | 105                 | 405,720                | 11,292                  | 29,475                   | 40,767                  | 364,953              | 10               |
|                                     | 25              | 96,568         | 280                                      | 140                 | 540,960                | 22,053                  | 41,403                   | 63,455                  | 477,504              | 8.5              |
|                                     | 27              | 122,605        | 385                                      | 193                 | 745,752                | 28,250                  | 49,499                   | 77,749                  | 668,003              | 9.6              |
| 1.65                                | 22              | 61,318         | 210                                      | 347                 | 1,340,808              | 11,292                  | 29,475                   | 40,767                  | 1,300,041            | 33               |
|                                     | 25              | 96,568         | 280                                      | 462                 | 1,785,168              | 22,053                  | 41,403                   | 63,455                  | 1,721,712            | 28               |
|                                     | 27              | 122,605        | 385                                      | 635                 | 2,453,640              | 28,250                  | 49,499                   | 77,749                  | 2,375,891            | 32               |
| 4.50                                | 22              | 61,318         | 210                                      | 945                 | 3,651,480              | 11,292                  | 29,475                   | 40,767                  | 3,610,713            | 90               |
|                                     | *25             | 96,568         | 280                                      | 1,260               | 4,868,640              | 22,053                  | 41,403                   | 63,455                  | 4,805,184            | 77               |
|                                     | 27              | 122,605        | 385                                      | 1,733               | 6,696,312              | 28,250                  | 49,499                   | 77,749                  | 6,618,563            | 86               |

All calculations correspond to foraging dives that average 200 m deep and a lunge frequency of 3.5 lunges per dive; dive duration was 9.8 min followed by a surface recovery period of 2.7 min, as determined from tag data (Table 1). Gross energy gain represents the energy density of krill after accounting for assimilation efficiency. The energetic cost of diving represents all costs that are not associated with lunge feeding *per se*, except for the filter phase between lunges. Efficiency is the ratio of gross energy gain to the total energy loss in a dive. \*Data in this row used in Fig. A1.

We apologise sincerely to authors and readers for any inconvenience these errors may have caused.
